# Supplementary material for: Prognostic role of distant disease-free interval from completion of adjuvant trastuzumab in HER2-positive early breast cancer: analysis from the ALTTO (BIG 2-06) trial
Source: PubMed Central journal article supplement — ESMO Open. 2020 Nov 4;5(6):e000979. doi: 10.1136/esmoopen-2020-000979 (PMC7643526; doi:10.1136/esmoopen-2020-000979), 2020-11-04
Supplement: esmoopen-2020-000979supp002.pdf [file esmoopen-2020-000979supp002.pdf]

Supplementary Table 1. Patterns of care after developing disease recurrence.

|                                | <b>Group A (≤12 months)<br/>n=201<br/>No. (%)</b> | <b>Group B (&gt;12 months)<br/>n=203<br/>No. (%)</b> | <b>P value</b> |
|--------------------------------|---------------------------------------------------|------------------------------------------------------|----------------|
| Surgery:                       |                                                   |                                                      | 0.825          |
| yes                            | 33 (16)                                           | 35 (17)                                              |                |
| no                             | 168 (84)                                          | 168 (83)                                             |                |
| Radiotherapy:                  |                                                   |                                                      | 0.130          |
| yes                            | 83 (41)                                           | 69 (34)                                              |                |
| no                             | 118 (59)                                          | 134 (66)                                             |                |
| First-line chemotherapy:       |                                                   |                                                      | 0.106          |
| Administered                   | 117 (58)                                          | 134 (66)                                             |                |
| Not administered               | 84 (42)                                           | 69 (34)                                              |                |
| Type of chemotherapy:          |                                                   |                                                      | 0.113          |
| Taxane-based regimens          | 60 (51)                                           | 84 (63)                                              |                |
| Capecitabine                   | 38 (32)                                           | 27 (20)                                              |                |
| Vinorelbine                    | 11 (9)                                            | 10 (7)                                               |                |
| Others                         | 8 (7)                                             | 13 (10)                                              |                |
| First-line endocrine therapy*: |                                                   |                                                      | 0.011          |
| Administered                   | 43 (46)                                           | 38 (29)                                              |                |
| Not administered               | 51 (54)                                           | 92 (71)                                              |                |
| Type of endocrine therapy*:    |                                                   |                                                      | 0.785          |
| SERD                           | 2 (13)                                            | 2 (17)                                               |                |
| SERM                           | 2 (13)                                            | 1 (8)                                                |                |
| AI                             | 10 (67)                                           | 9 (75)                                               |                |
| OFS                            | 1 (7)                                             | 0 (0)                                                |                |
| Missing                        | 28                                                | 26                                                   |                |
| First-line anti-HER2 therapy:  |                                                   |                                                      | 0.988          |
| Administered                   | 115 (57)                                          | 116 (57)                                             |                |
| Not administered/missing       | 86 (43)                                           | 87 (43)                                              |                |
| Type of anti-HER2 treatment**: |                                                   |                                                      | 0.022          |
| Trastuzumab alone              | 70 (61)                                           | 75 (65)                                              |                |

|                          |         |         |  |
|--------------------------|---------|---------|--|
| Pertuzumab ± Trastuzumab | 9 (8)   | 20 (17) |  |
| Lapatinib alone          | 29 (25) | 13 (11) |  |
| T-DM1                    | 0 (0)   | 1 (<1)  |  |
| Others                   | 7 (6)   | 7 (6)   |  |

\*calculated on the total number of patients with hormone receptor-positive breast cancer (94 in group A and 130 in group B).

\*\*calculated on the total number of patients who received first-line anti-HER2 therapy (115 in group A and 116 in group B).

*SERD* selective estrogen receptor degrader, *SERM* selective estrogen receptor modulator, *AI* aromatase inhibitors, *OFS* ovarian function suppression.

Supplementary Table 2. Univariate and multivariate analyses for overall survival.

|                                   | Events (%) | N   | Univariate HR<br>(95% CI) | Univariate P<br>value | Multivariate* HR<br>(95% CI) | Multivariate P<br>value |
|-----------------------------------|------------|-----|---------------------------|-----------------------|------------------------------|-------------------------|
| <b>All patients</b>               | 262 (64.9) | 404 |                           |                       |                              |                         |
| Group A (≤12 months)              | 156 (77.6) | 201 | -                         | -                     | -                            | -                       |
| Group B (>12 months)              | 106 (52.2) | 203 | 0.61 (0.48-0.78)          | <0.001                | 0.69 (0.54-0.89)             | 0.004                   |
| <b>No pertuzumab</b>              | 120 (32.1) | 374 |                           |                       |                              |                         |
| Group A (≤12 months)              | 38 (19.7)  | 193 | -                         | -                     | -                            | -                       |
| Group B (>12 months)              | 82 (45.3)  | 181 | 0.62 (0.48-0.79)          | <0.001                | 0.66 (0.51-0.86)             | 0.002                   |
| <b>Hormone receptor-positive</b>  | 127 (56.7) | 224 |                           |                       |                              |                         |
| Group A (≤12 months)              | 69 (73.4)  | 94  | -                         | -                     | -                            | -                       |
| Group B (>12 months)              | 58 (44.6)  | 130 | 0.63 (0.44-0.89)          | 0.009                 | 0.69 (0.48-0.99)             | 0.043                   |
| <b>Hormone receptor-negative</b>  | 135 (75.0) | 180 |                           |                       |                              |                         |
| Group A (≤12 months)              | 87 (81.3)  | 107 | -                         | -                     | -                            | -                       |
| Group B (>12 months)              | 48 (65.8)  | 73  | 0.66 (0.46-0.94)          | 0.022                 | 0.68 (0.48-0.98)             | 0.040                   |
| <b>Trastuzumab</b>                | 138 (63.9) | 216 |                           |                       |                              |                         |
| Group A (≤12 months)              | 87 (77.0)  | 113 | -                         | -                     | -                            | -                       |
| Group B (>12 months)              | 51 (49.5)  | 103 | 0.64 (0.45-0.91)          | 0.012                 | 0.80 (0.55-1.17)             | 0.249                   |
| <b>Trastuzumab plus lapatinib</b> | 124 (66.0) | 188 |                           |                       |                              |                         |
| Group A (≤12 months)              | 69 (78.4)  | 88  | -                         | -                     | -                            | -                       |
| Group B (>12 months)              | 55 (55.0)  | 100 | 0.55 (0.38-0.78)          | <0.001                | 0.55 (0.38-0.80)             | 0.002                   |

\* Multivariate analyses were adjusted for age at diagnosis, tumor size and hormone receptor status.

HR hazard ratio, CI confidence intervals.
