# Supplementary figures and images for: Prognostic role of distant disease-free interval from completion of adjuvant trastuzumab in HER2-positive early breast cancer: analysis from the ALTTO (BIG 2-06) trial
Source: PubMed Central journal article supplement — ESMO Open. 2020 Nov 4;5(6):e000979. doi: 10.1136/esmoopen-2020-000979 (PMC7643526; doi:10.1136/esmoopen-2020-000979), 2020-11-04

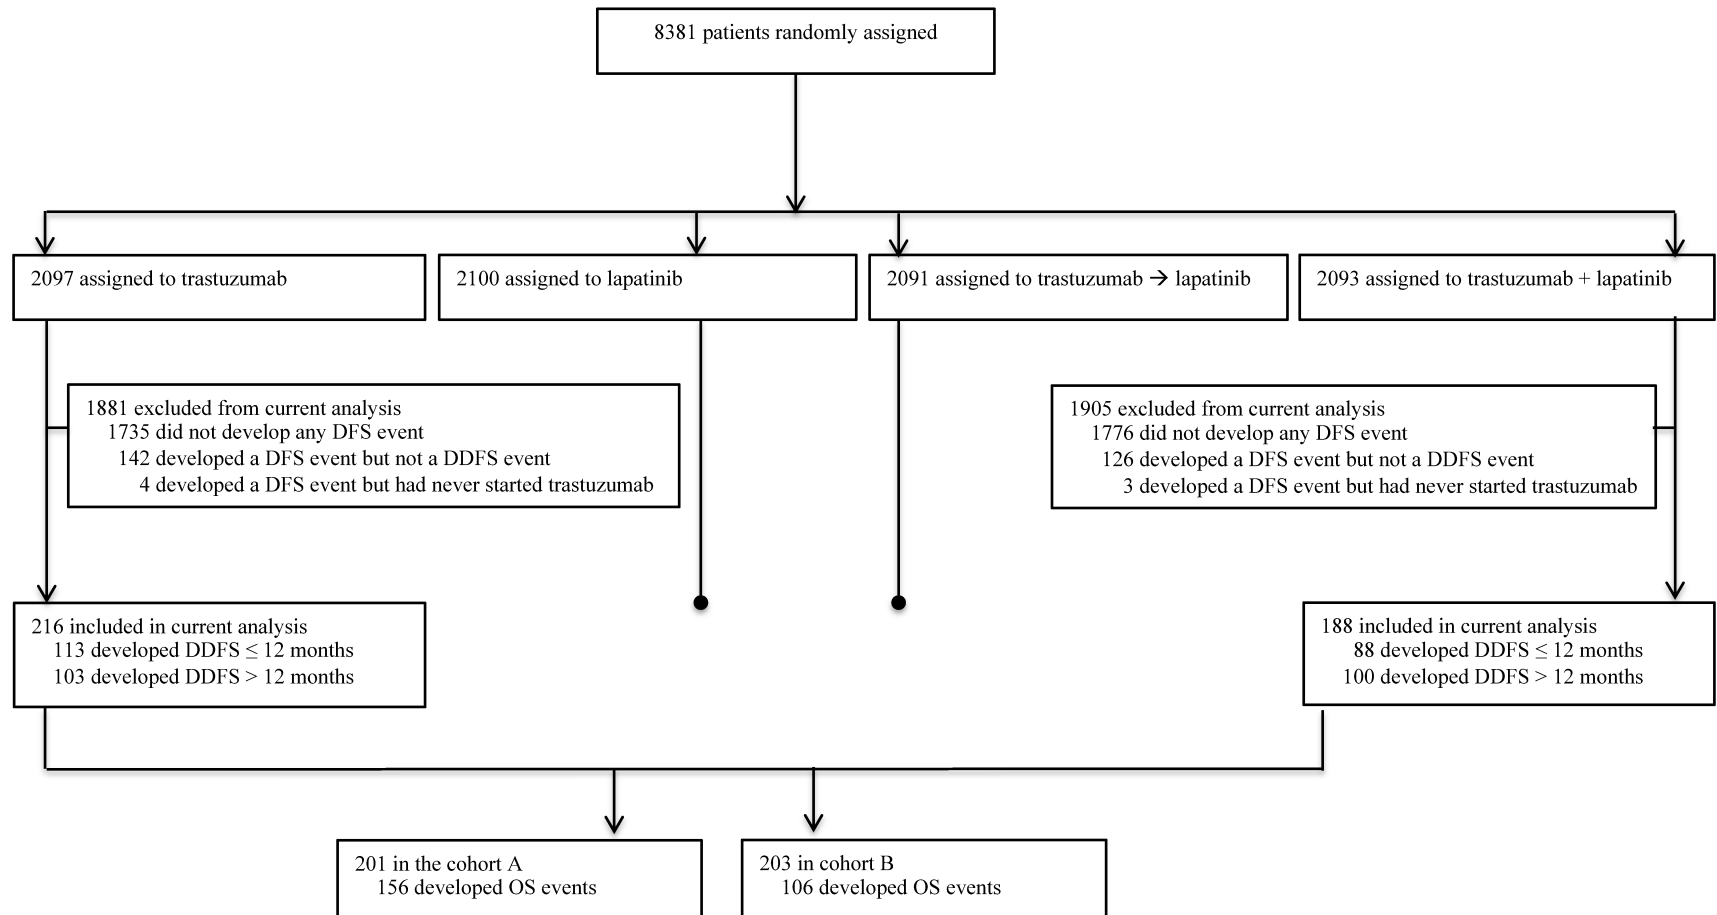

Supplement: esmoopen-2020-000979supp001.pdf [file esmoopen-2020-000979supp001.pdf]
